# Supplementary material for: Multi-Dimensional Scheduling for Real-Time Tasks on Heterogeneous Clusters
Source: Springer Nature journal article supplement (doi:10.1007/s11390-009-9235-2), 2009-05-01
Supplement: 11390_2009_9235_MOESM1_ESM.pdf [file 11390_2009_9235_MOESM1_ESM.pdf]

## 异构集群系统中实时任务多维调度研究

### 1. 本文的创新点

本文提出了一种在异构集群系统中提供多种性能保证的调度策略。该调度策略综合考虑了实时任务的时间要求、任务的服务质量（本文指任务处理后的质量）、服务质量的公平性、系统的吞吐率和负载均衡。首先，本文给出一种新的调度器模型用以满足调度目标。该调度器模型由实时控制器、QoS级别控制器和均衡控制器3个部分组成。实时控制器用来决定接纳或拒绝一个任务，可以采用任何已有或新提出的实时调度算法，因此具有很强的灵活性和扩展性。实时控制器在处理任务时，任务首先被设定为最低的QoS级别用以提高任务的调度成功率。QoS级别控制器用来提高接收队列中任务的QoS级别并使得这些任务具有相对公平的QoS服务。本文提出了QoS收益的概念并给出了QoS收益的定义。通过最大化QoS收益来提高任务的QoS级别并提供公平服务。另外，本文提出的QoS级别提升机制有效地避免了局部极值问题，兼顾了QoS级别的最大化和公平性。均衡控制器在保证任务接收率和QoS收益不变的情况下，调整部分任务的分配以提高系统的吞吐率并达到负载均衡。在本文提出的调度器模型的基础上，提出了一种多维调度策略MDSS。MDSS包括3个步骤，第1个步骤采用已有的DASAP算法用来接纳或拒绝一个任务。第2个步骤采用一种本文提出的新算法MQFQ用以提高所接纳任务的QoS级别，并使得所接纳的任务具有较公平的QoS服务。第3个步骤采用本文提出的另一种新算法ITLB，该算法用来均衡负载，并提高系统的吞吐率。

### 2. 实现方法

本文通过大量的模拟实验，对MDSS策略和MDSR策略、DASAP算法和DALAP算法进行了比较分析。MDSS策略也包含3个步骤，第1步和第3步与MDSS策略相同，第2步则采用Round-Robin方法来提高任务的QoS级别。同时，为体现比较的公平性，将DASAP算法和DALAP算法进行了略微修改，让它们随机选取任务的QoS级别。本文主要从任务的调度成功率、QoS收益均值、QoS级别均值、QoS级别标准差、调度跨度和节点完成时间标准差6个方面来比较各个调度策略和算法的性能。

### 3. 结论及未来待解决的问题

本文在提出的一种多维调度器模型的基础上,提出了一种3步骤的调度策略MDSS。该调度策略综合考虑了实时任务的时间要求、任务的服务质量、服务质量的公平性、系统的吞吐率和负载均衡。本文提出的MQFQ算法和ITLB算法用以提高任务的QoS收益和吞吐率并达到负载均衡。通过大量的实验测试了MDSS策略的性能,实验结果表明,MDSS策略优于其他方法。

下一步的研究工作主要包括3个方面。第一,为使得调度结果更为精确,将进一步考虑朱晓敏,陆佩忠. Multi-Dimensional Scheduling for Real-Time Tasks on Heterogeneous Clusters. JOURNAL OF COMPUTER SCIENCE AND TECHNOLOGY 23(1): ~ November 2007 任务的通信时间、调度时间和分发时间。第二,在MDSS策略的基础上,采用PB (Primary/Backup)方法来研究任务的容错调度问题。第三,将系统的可靠性需求增加到MDSS策略中。

### 4. 实用价值或应用前景

对于计算密集型和数据密集型应用,集群计算技术是目前最为经济和可靠的手段,尤其的异构集群计算环境更为流行。本文提出的异构集群系统中实时任务多维调度策略,对于大规模具有QoS需求的实时任务处理具有很高的实用价值,如目前采用集群软件无线电技术来实现通信信号的高增益和低时延处理,采用集群计算技术实现实时多媒体数据处理等等都是极具应用前景的研究课题。本文正是在这样的应用背景下提出的,因此具有很高的实用价值和应用前景。
